# Supplementary material for: Lactiplantibacillus plantarum Postbiotics Suppress Salmonella Infection via Modulating Bacterial Pathogenicity, Autophagy and Inflammasome in Mice
Source: MDPI journal article supplement (doi:10.3390/ani13203215), 2023-10-14

p-ULK1-1

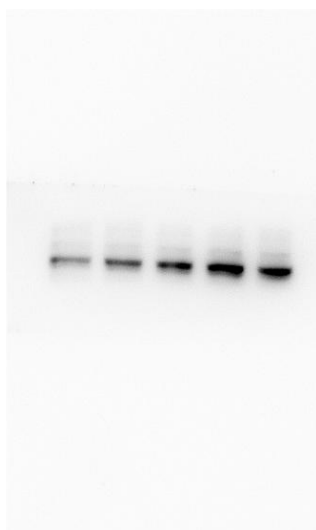

p-ULK1-2

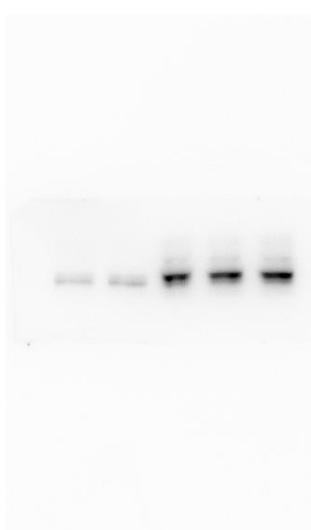

p-ULK1-3

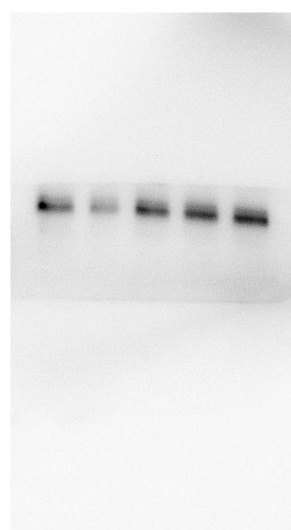

ULK1-1

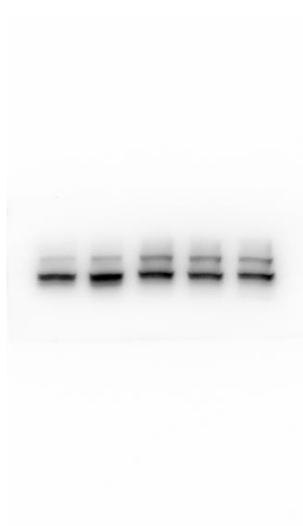

ULK1-2

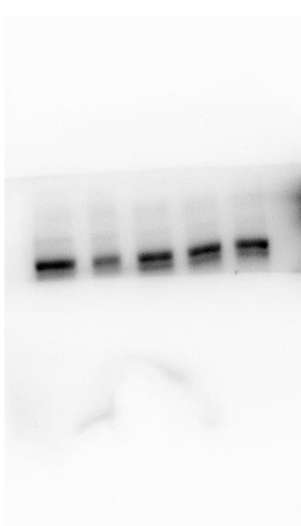

ULK1-3

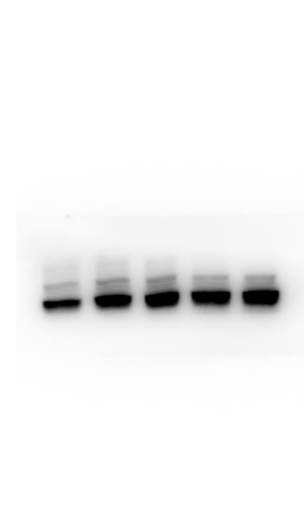

TAK1-1

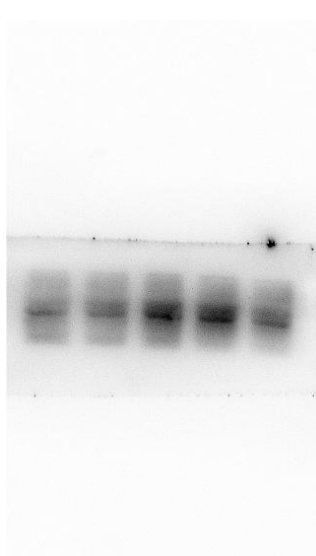

TAK1-2

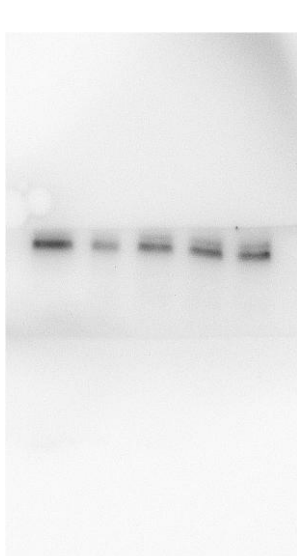

TAK1-3

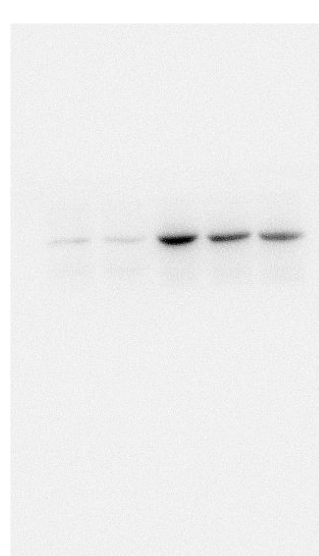

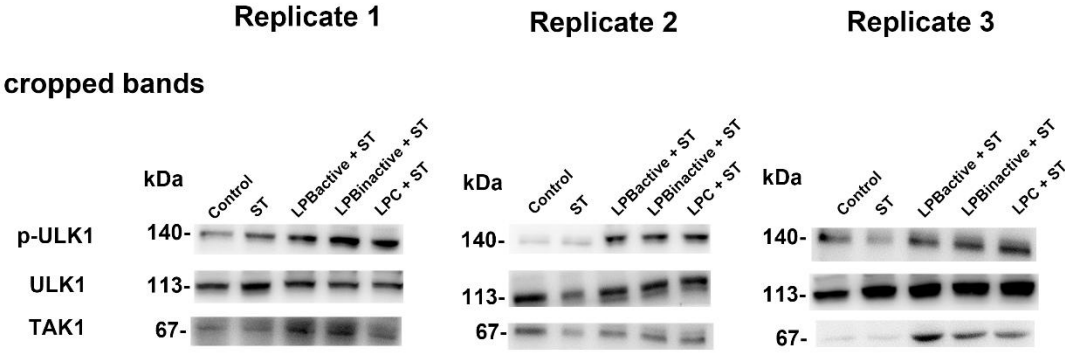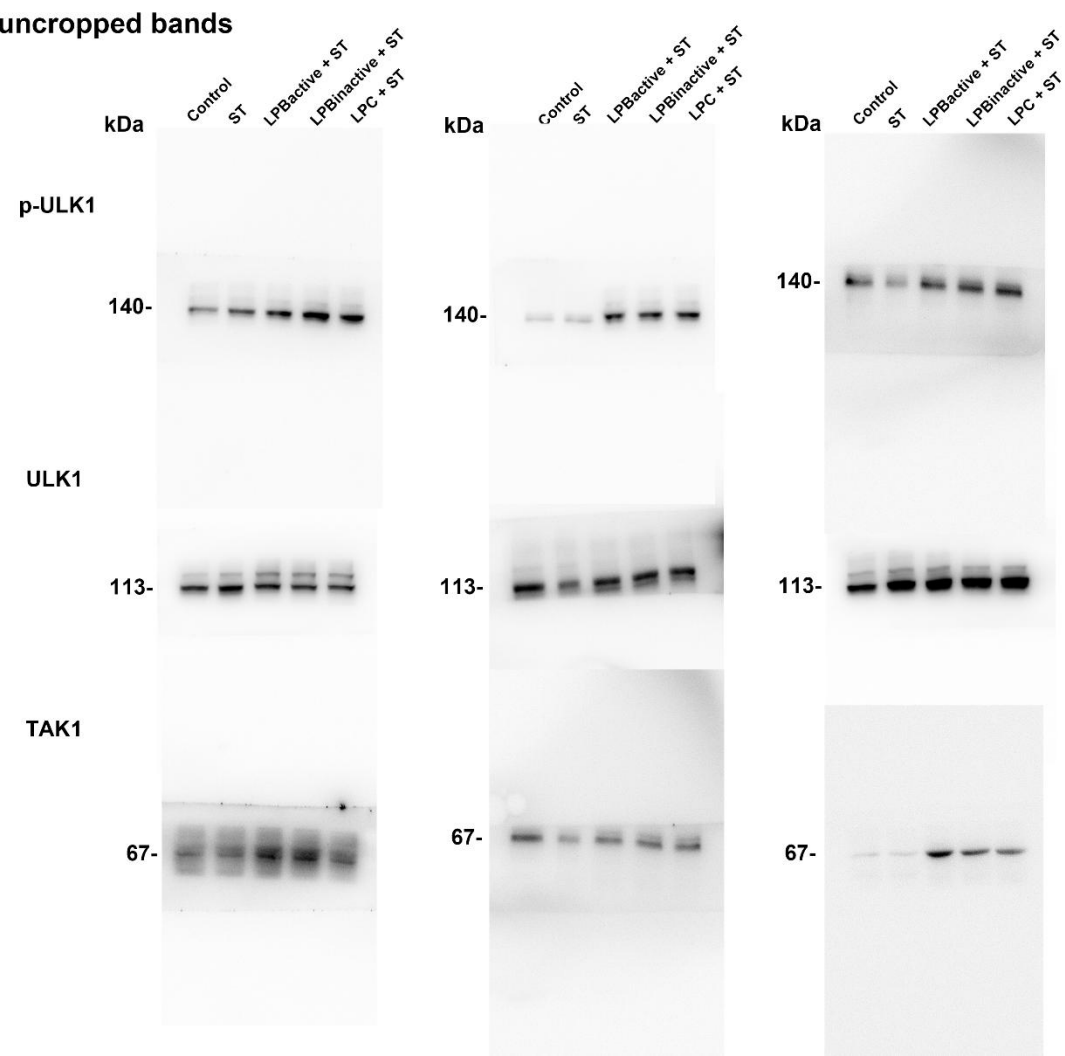

p-AMPK-1

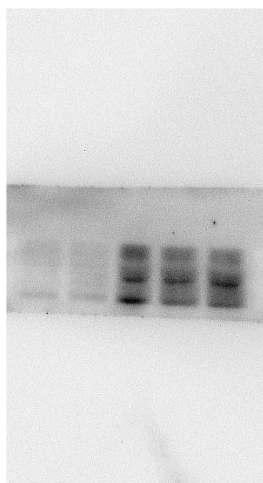

p-AMPK-2

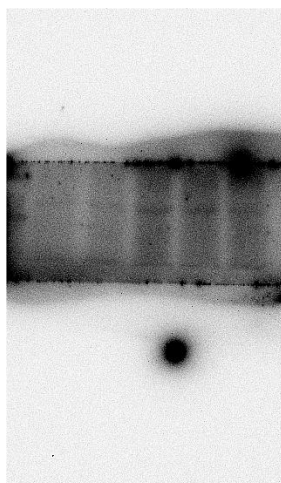

p-AMPK-3

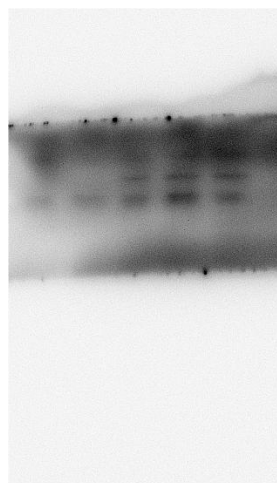

AMPK-1

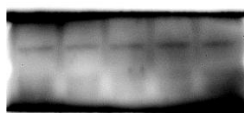

AMPK-2

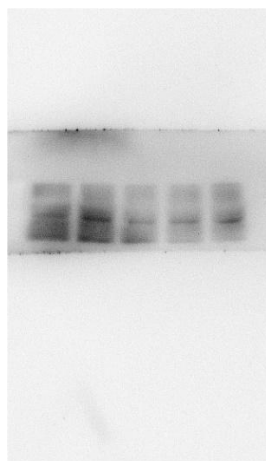

AMPK-3

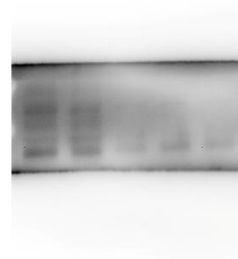

$\beta$ -actin-1

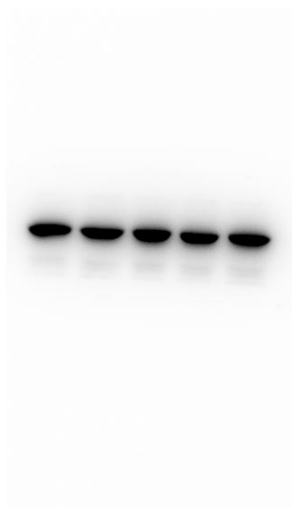

$\beta$ -actin-2

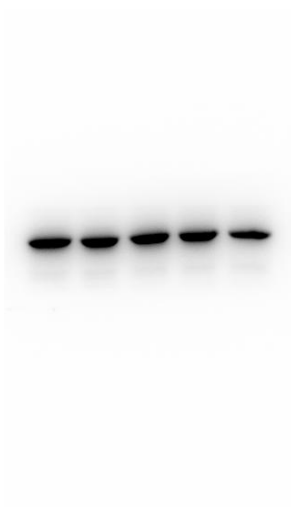

$\beta$ -actin-3

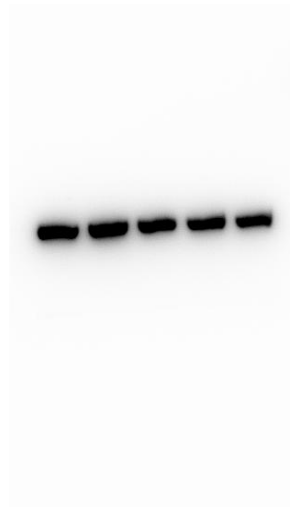

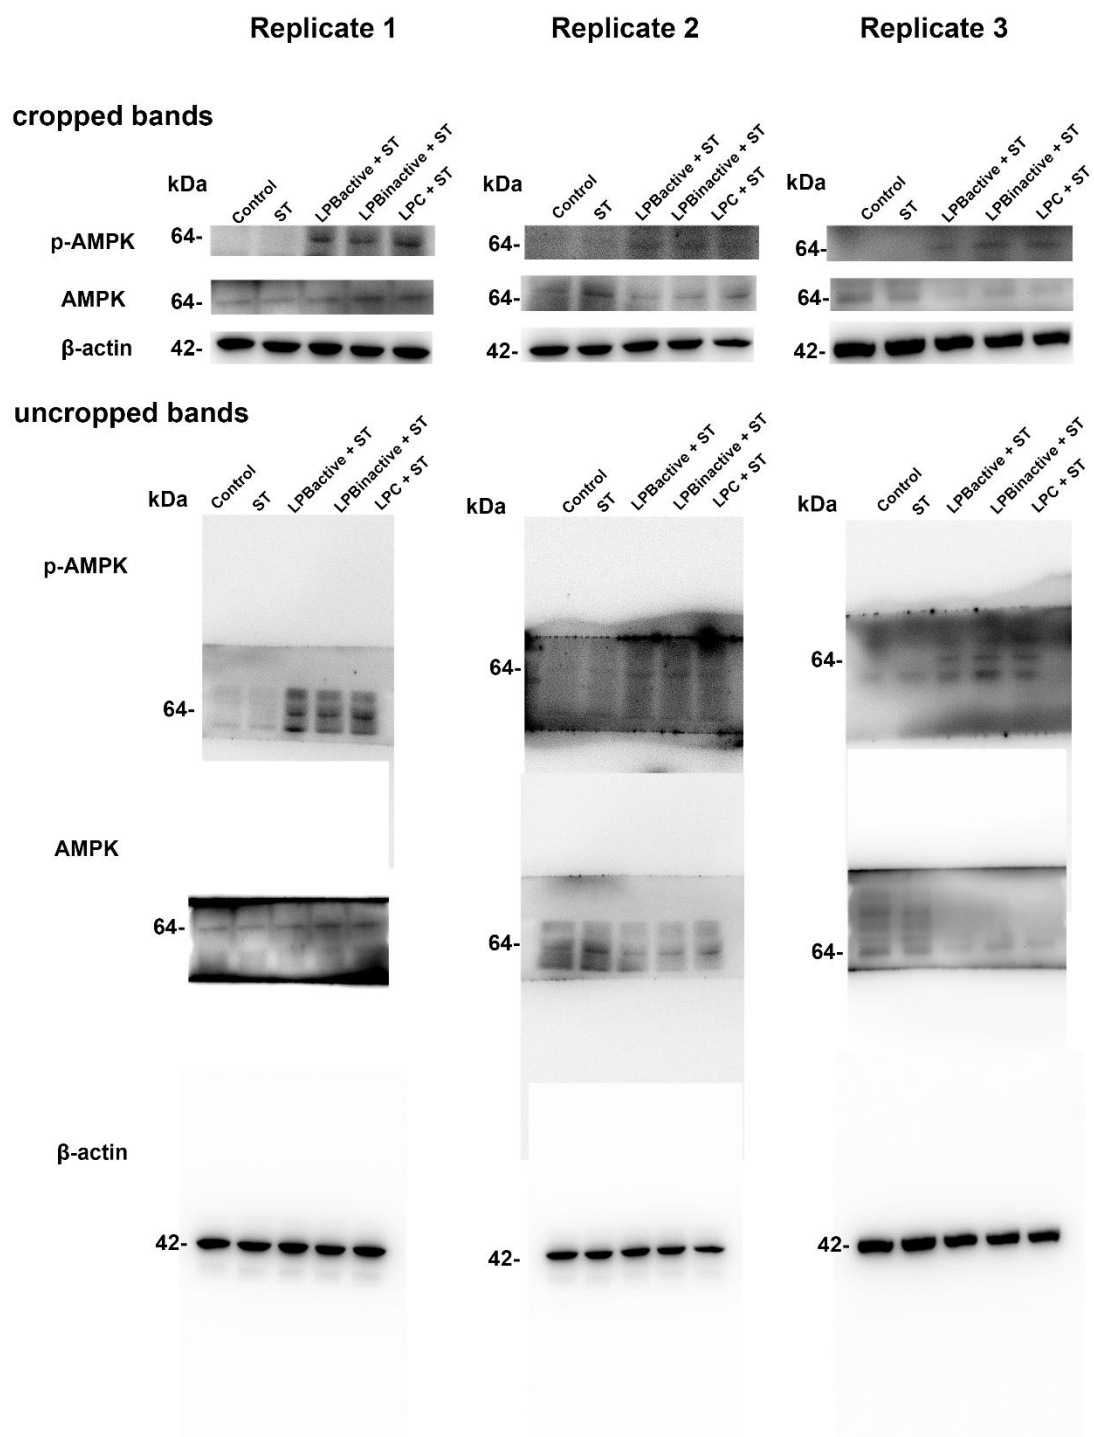

Supplement: s1 [file s1]
