# Supplementary material for: Lactiplantibacillus plantarum Postbiotics Suppress Salmonella Infection via Modulating Bacterial Pathogenicity, Autophagy and Inflammasome in Mice
Source: Animals (Basel). 2023 Oct 14;13(20):3215. doi: 10.3390/ani13203215 (PMC10603688; doi:10.3390/ani13203215)
Supplement: Supplementary file 1 [file animals-13-03215-s001.zip]

Archive with 4 entries (4 files):
- Figure S1 Original bands  for figure 3c.pdf
- Figure S2 Original bands  for figure 5b.pdf
- Figure S3 Original bands  for figure 6a.pdf
- Figure S4 Original bands  for figure 6b.pdf
