# Supplementary figures and images for: Lactiplantibacillus plantarum Postbiotics Suppress Salmonella Infection via Modulating Bacterial Pathogenicity, Autophagy and Inflammasome in Mice
Source: MDPI journal article supplement (doi:10.3390/ani13203215), 2023-10-14

Claudin-1-1

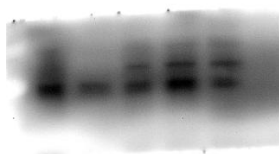

Claudin-1-2

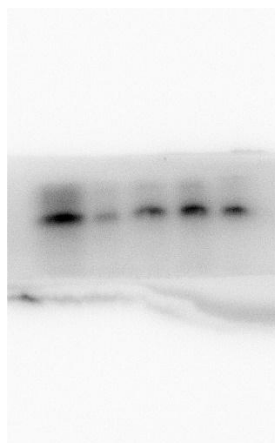

Claudin-1-3

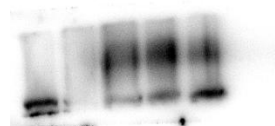

Occludin-1

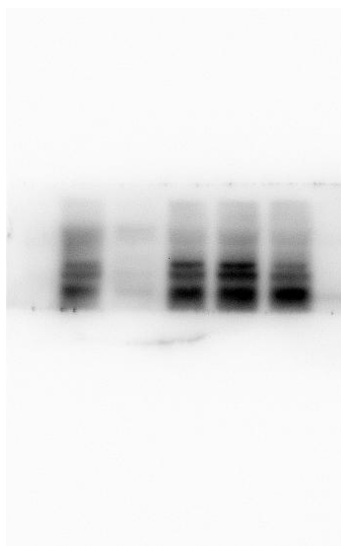

Occludin-2

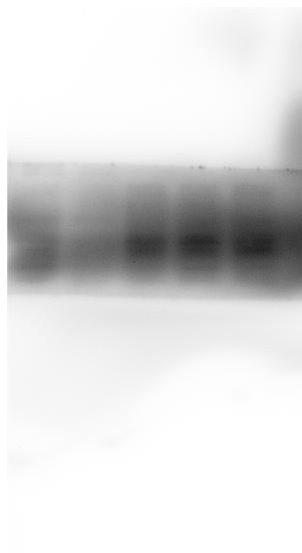

Occludin-3

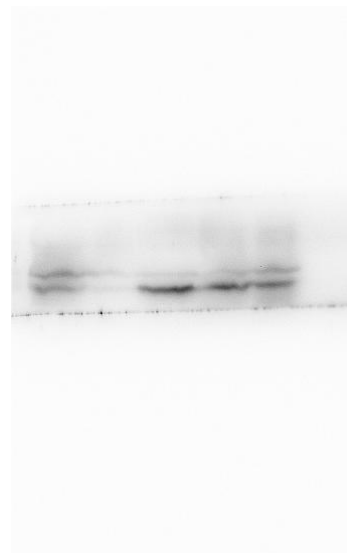

$\beta$ -actin-1

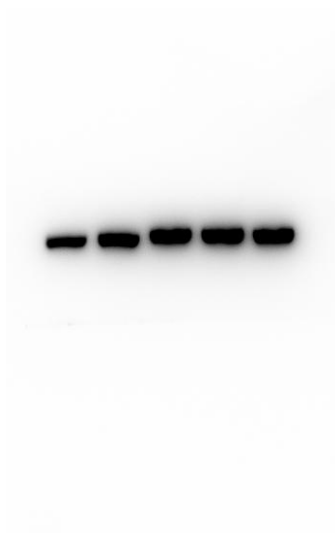

$\beta$ -actin-2

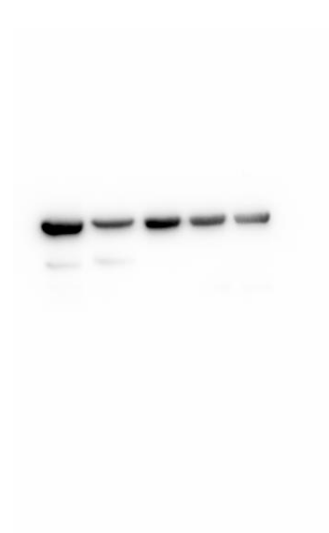

$\beta$ -actin-3

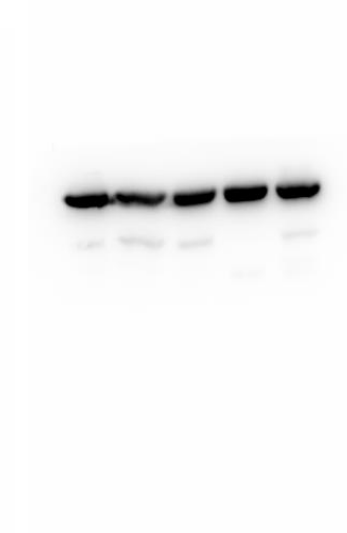

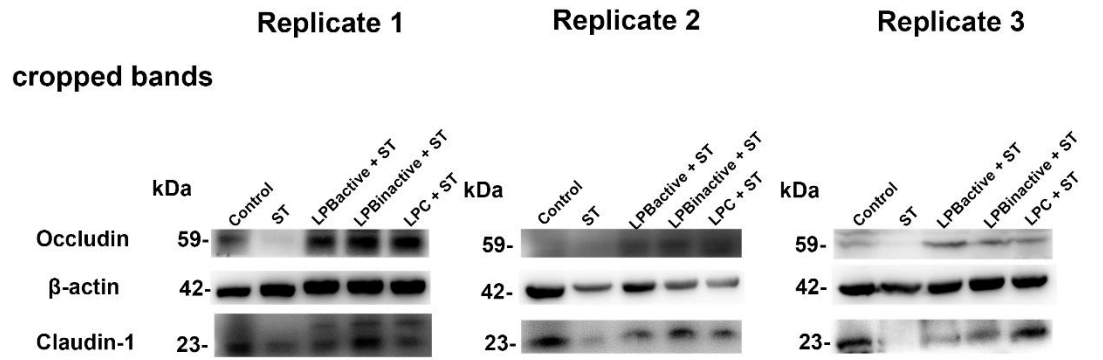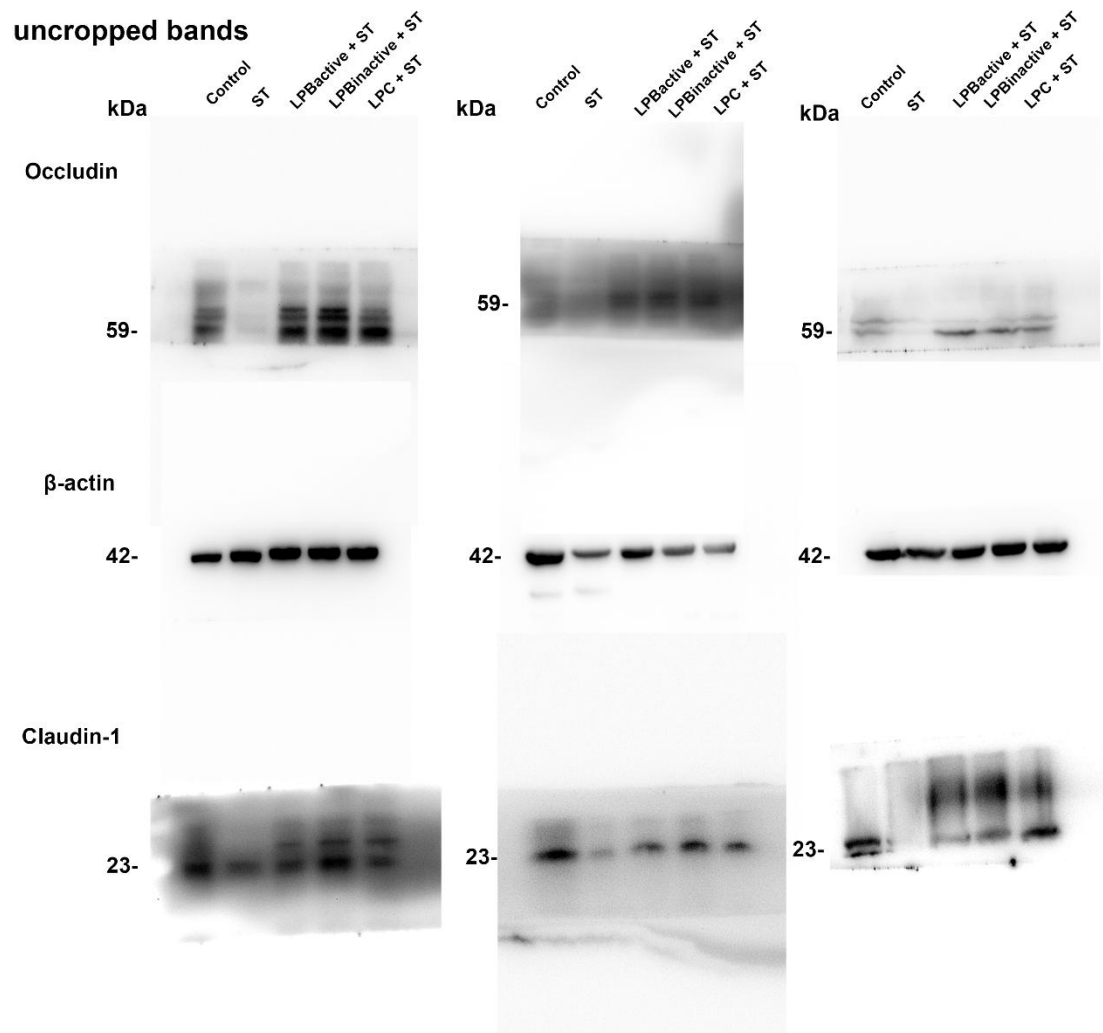

Supplement: s1 [file s1]

Caspase-1-1

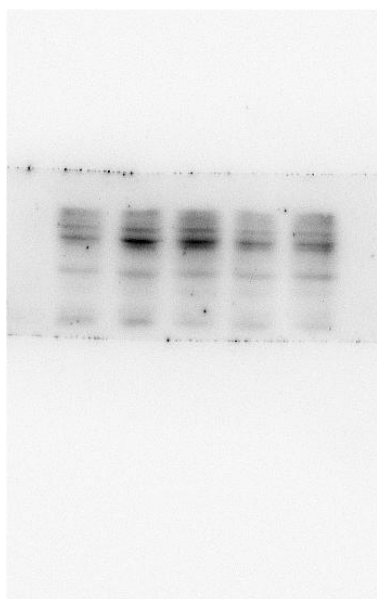

Caspase-1-2

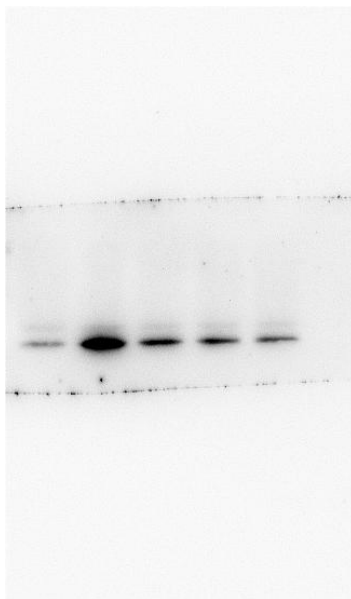

Caspase-1-3

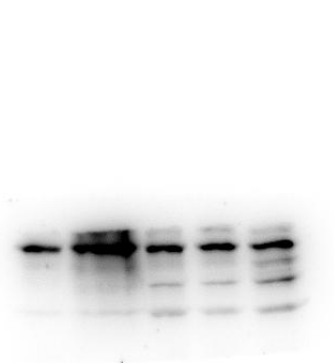

NLRP3-1

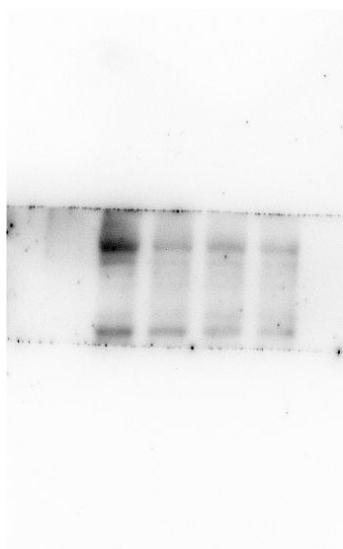

NLRP3-2

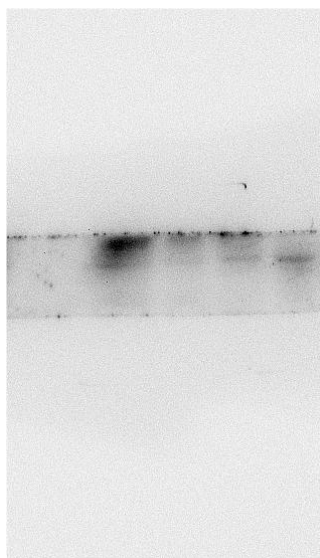

NLRP3-3

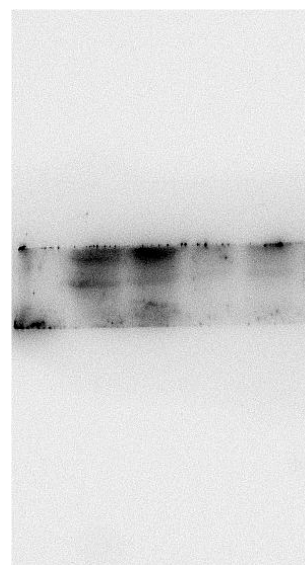

$\beta$ -actin-1

$\beta$ -actin-2

$\beta$ -actin-3

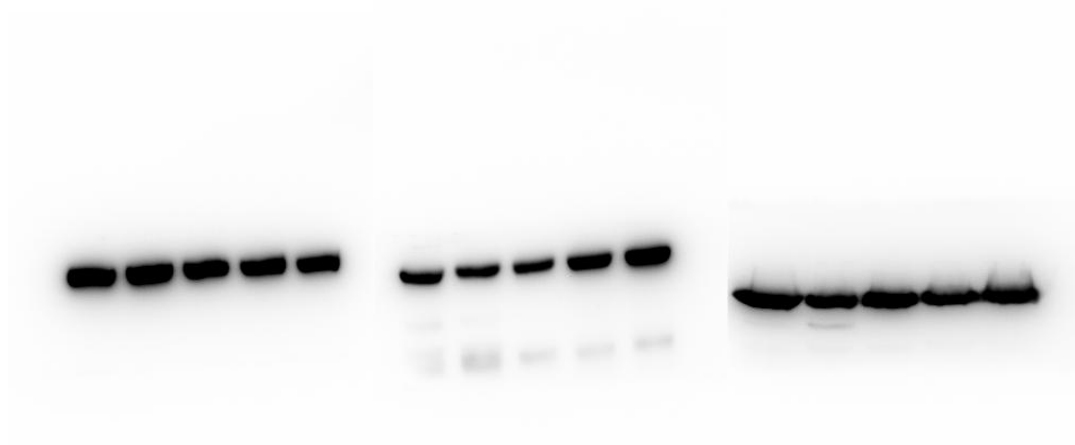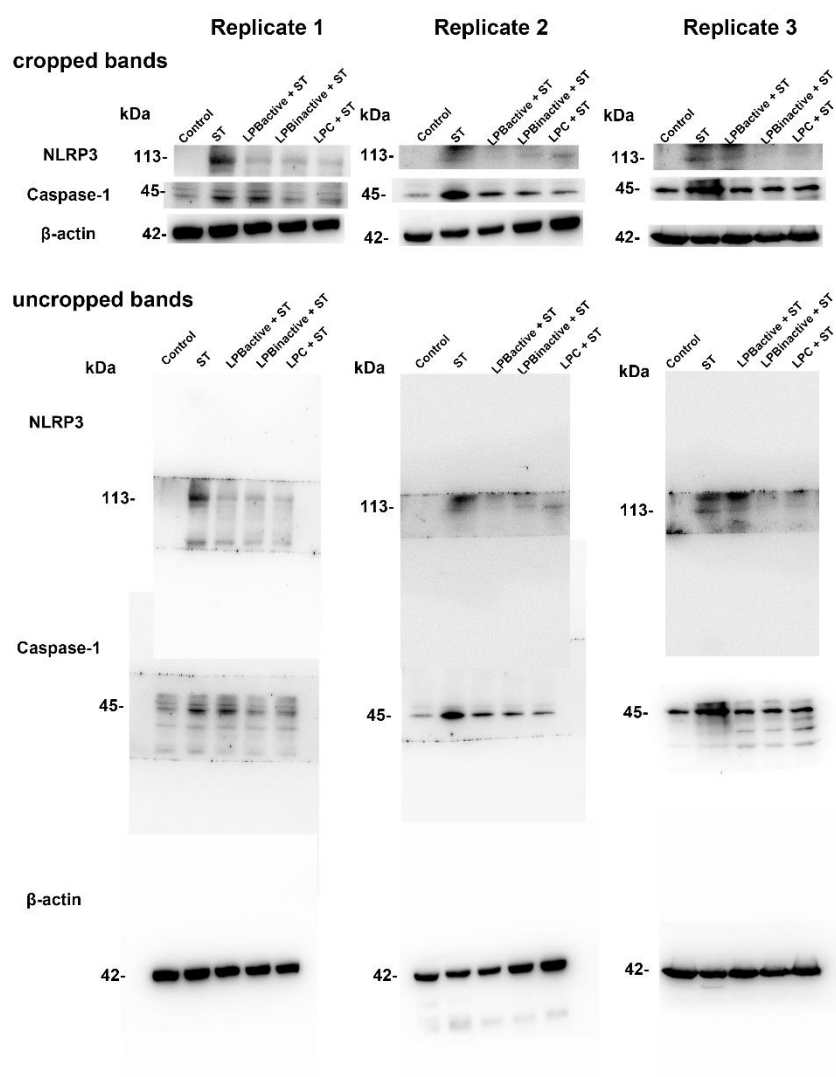

Supplement: s1 [file s1]

**Beclin1-1**

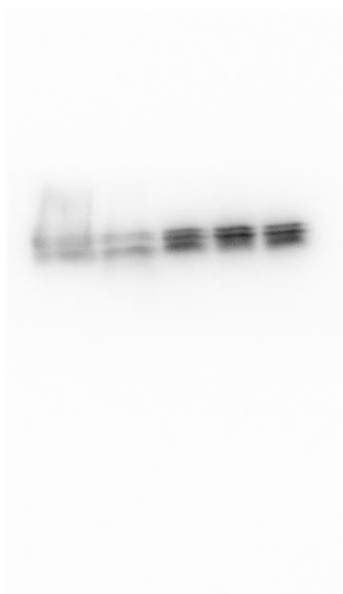

**Beclin1-2**

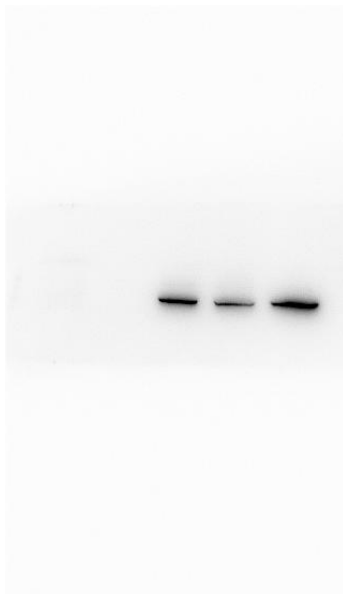

**Beclin1-3**

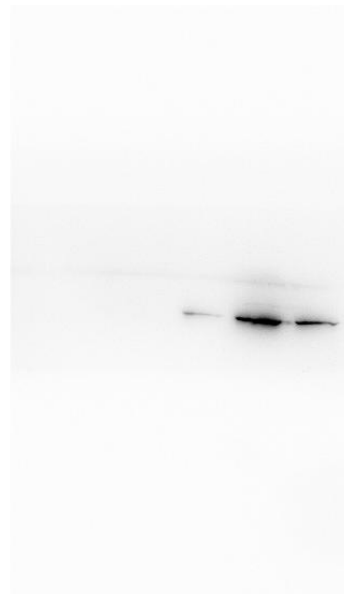

**LC3 -1**

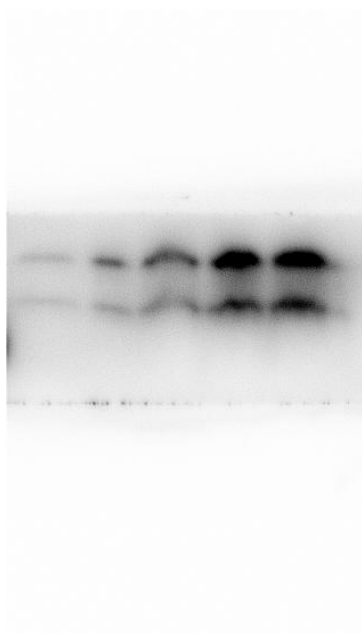

**LC3 -2**

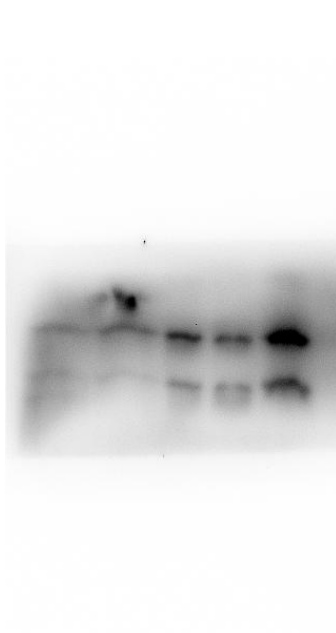

**LC3 -3**

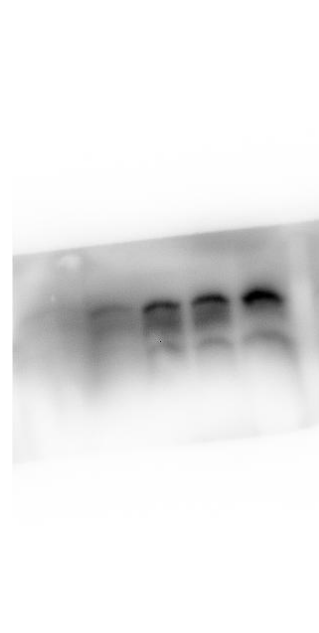

P62-1

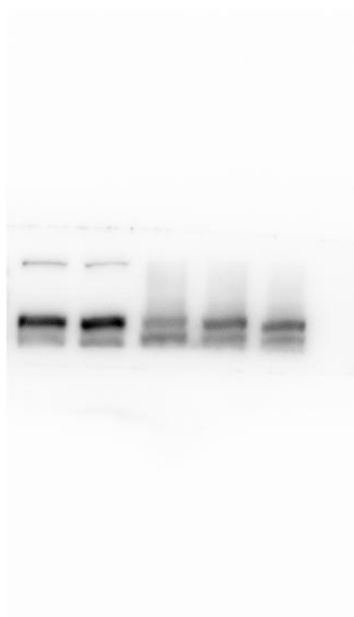

p62-2

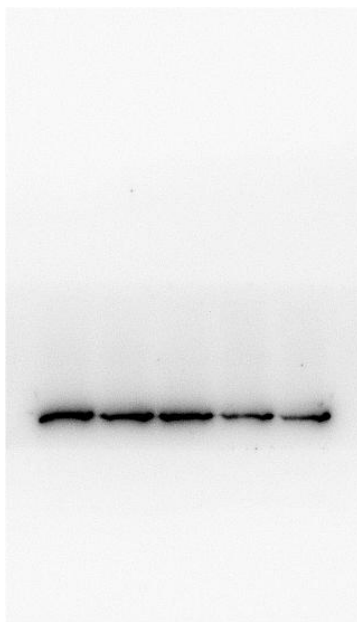

p62-3

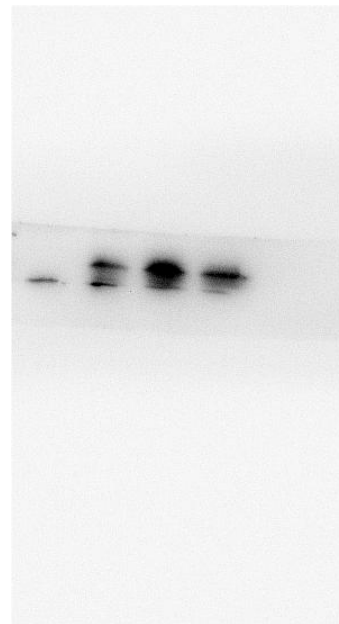

$\beta$ -actin-1

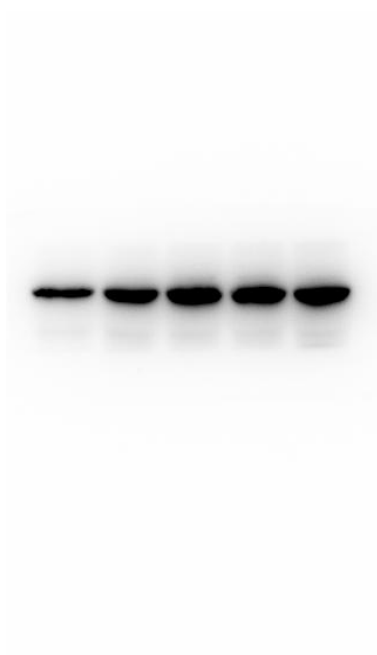

$\beta$ -actin-2

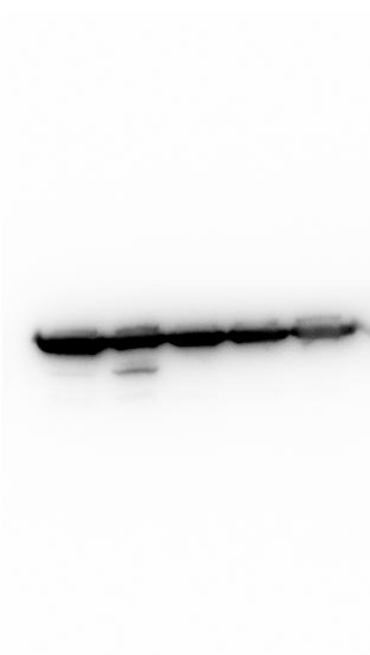

$\beta$ -actin-3

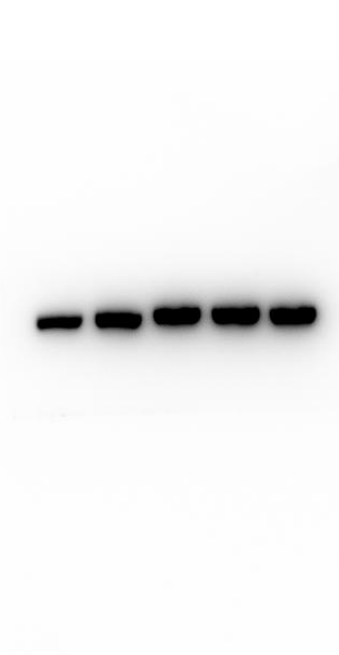

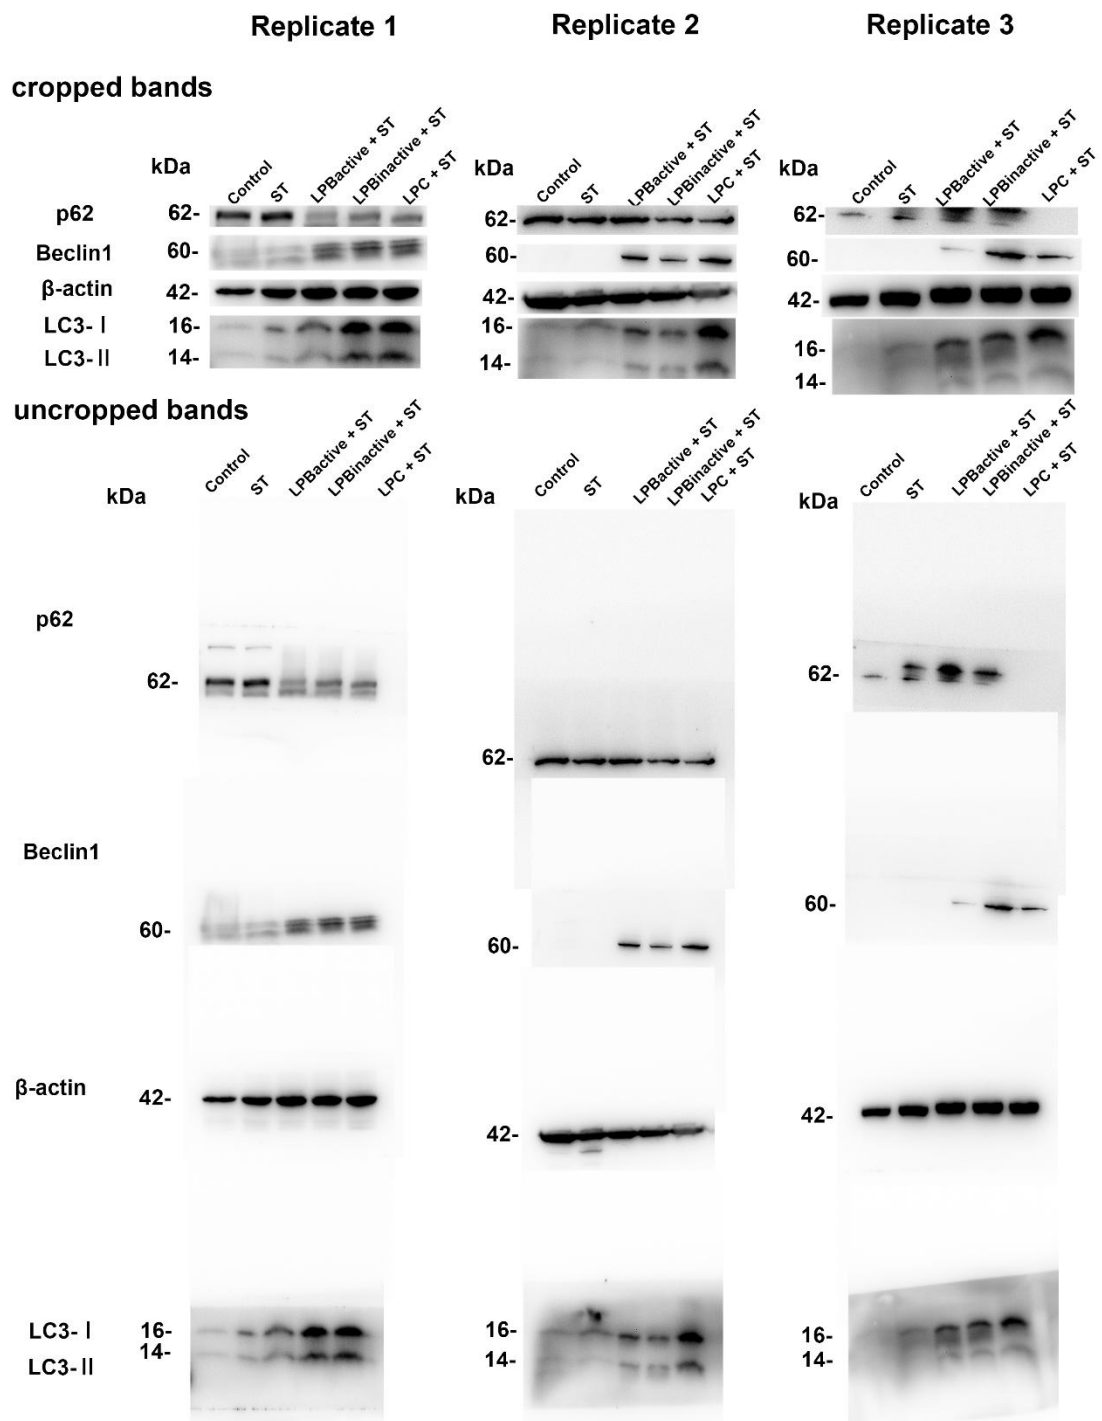

Supplement: s1 [file s1]
